# Supplementary material for: Porous fluorine-doped tin oxide as a promising substrate for electrochemical biosensors—demonstration in hydrogen peroxide sensing
Source: Royal Society of Chemistry journal article supplement (doi:10.1039/c4tb01191k), 2014-09-29
Supplement: c4tb01191k1.pdf [file c4tb01191k1.pdf]

## Supporting information

### **Porous fluorine-doped tin oxide as a promising substrate for electrochemical biosensors – demonstration in hydrogen peroxide sensing**

*Kuan-Ting Lee,<sup>1)</sup> Dai-Min Liu,<sup>1)</sup> Yung-Yung Liang,<sup>1)</sup> Nobuhiro Matsushita,<sup>2)</sup>*

*Toshiyuki Ikoma<sup>3)</sup>, Shih-Yuan Lu<sup>1)</sup>\**

1) Department of Chemical Engineering, National Tsing Hua University, Hsinchu 30013, TAIWAN, 2) Materials and Structures Laboratory, Tokyo Institute of Technology, 4259 Nagatsuta, Midori-ku, Yokohama, 226-8503, JAPAN, 3) Department of Inorganic Materials, Tokyo Institute of Technology, 2-12-1 Ookayama, Meguro-ku, Tokyo, 152-8550, JAPAN.

\*Email : SYLu@mx.nthu.edu.tw

#### **More Results and Discussion:**

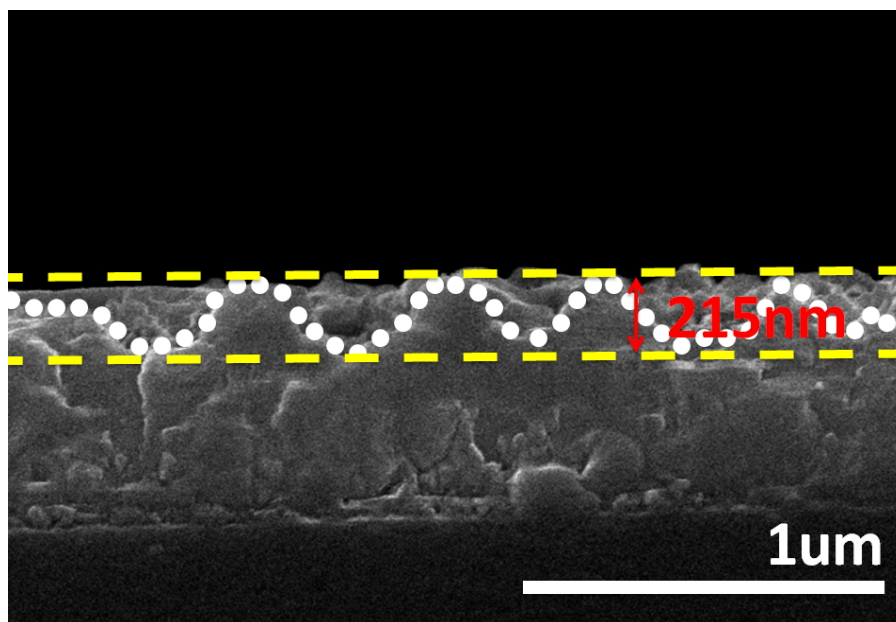

Fig. S1 Cross-sectional SEM image of electrochemically treated FTO sample (7 V, 0.07M, 30 min).

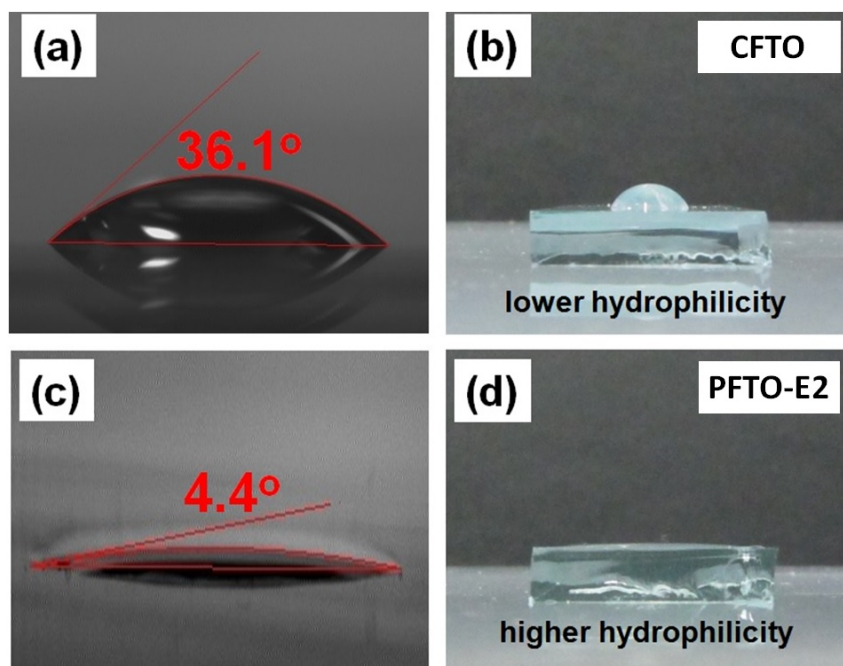

Fig. S2 Contact angles of (a) CFTO and (c) PFTO-E2, and corresponding photographs of water droplet on (b) CFTO and (d) PFTO-E2.

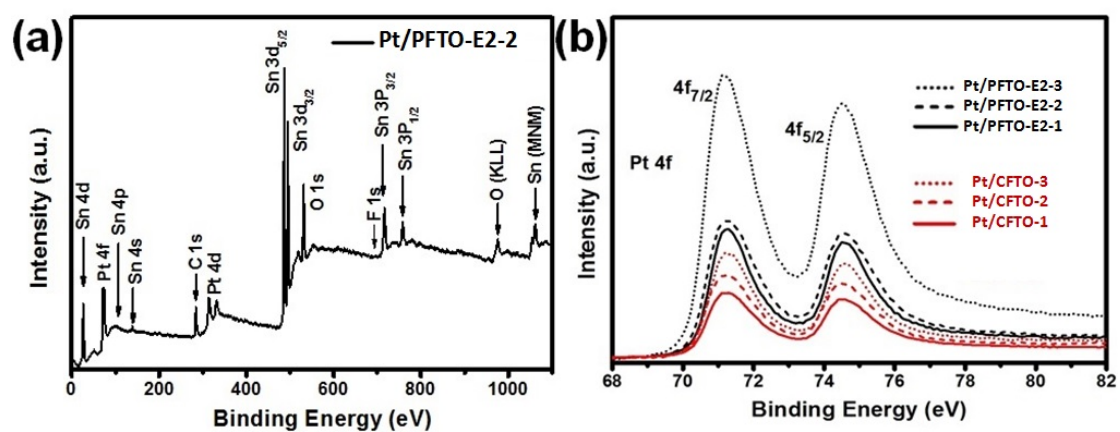

Figure S3 (a) Wide scan XPS spectrum of Pt/PFTO-E2-2. (b) Pt 4f core level XPS spectra for samples Pt/CFTO-1, Pt/CFTO-2, Pt/CFTO-3, Pt/PFTO-E2-1, Pt/PFTO-E2-2, and Pt/PFTO-E2-3.

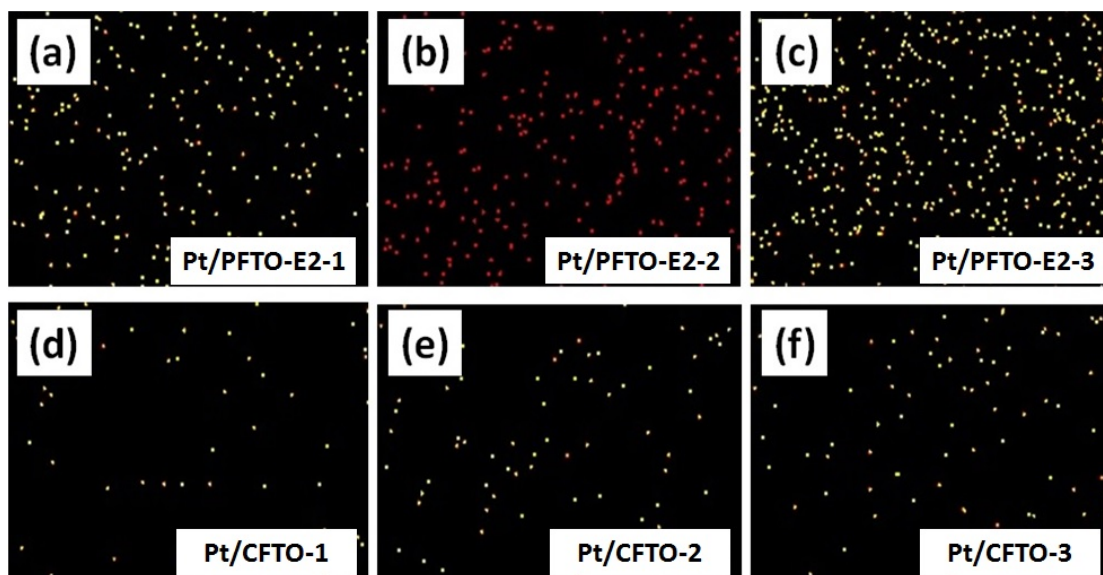

Fig. S4 EDX mapping of Pt on samples (a) Pt/PFTO-E2-1, (b) Pt/PFTO-E2-2, (c) Pt/PFTO-E2-3, (d) Pt/CFTO-1, (e) Pt/CFTO-2, and (f) Pt/CFTO-3.

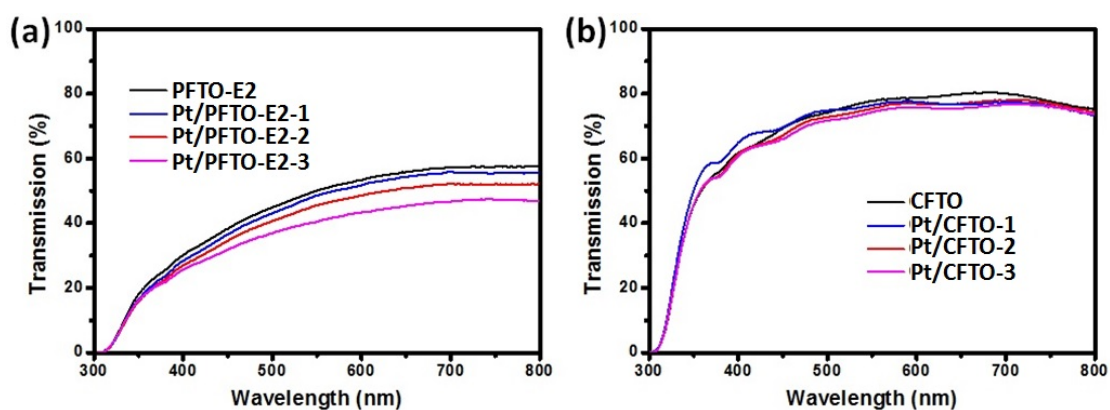

Fig. S5 Transmission spectra of (a) samples PFTO-E2, Pt/PFTO-E2-1, Pt/PFTO-E2-2, Pt/PFTO-E2-3, and (b) samples CFTO, Pt/CFTO-1, Pt/CFTO-2, Pt/CFTO-3.

Table S1 Surface roughness of FTO substrates with Pt decorated in different concentration of  $H_2PtCl_6$ .

|            | 0mg<br>(nm) | 0.25mg<br>(nm) | 0.5mg<br>(nm) | 5mg<br>(nm) |
|------------|-------------|----------------|---------------|-------------|
| Pt/CFTO    | 18.1        | 16.7           | 16.1          | 17.2        |
| Pt/PFTO-E2 | 36.5        | 29.5           | 45.8          | 20.9        |

Table S2 XPS analyses of Pt decorated CFTO and PFTO electrodes.

|  | 0.25mg (at%) | 0.5mg (at%) | 5mg (at%) |
|--|--------------|-------------|-----------|
|--|--------------|-------------|-----------|

|                   |     |     |      |
|-------------------|-----|-----|------|
| <b>Pt/CFTO</b>    | 2.4 | 3.5 | 4.4  |
| <b>Pt/PFTO-E2</b> | 5.4 | 6.9 | 15.3 |

Table S3 sheet resistances and static contact angles of both Pt/CFTOs and Pt/PFTOs

|                   | <b>0mg</b>       | <b>0.25mg</b>    | <b>0.5mg</b>     | <b>5mg</b>       |
|-------------------|------------------|------------------|------------------|------------------|
|                   | $\Omega/\square$ | $\Omega/\square$ | $\Omega/\square$ | $\Omega/\square$ |
| <b>Pt/CFTO</b>    | 7.2              | 7.6              | 8.1              | 7.3              |
| <b>Pt/PFTO-E2</b> | 17.1             | 14.9             | 12.7             | 10.5             |

  

|                   | <b>0mg</b> | <b>0.25mg</b> | <b>0.5mg</b> | <b>5mg</b> |
|-------------------|------------|---------------|--------------|------------|
| <b>Pt/CFTO</b>    | 36°        | 37°           | 44°          | 48°        |
| <b>Pt/PFTO-E2</b> | 4°         | 52°           | 71°          | 88°        |
